# Supplementary material
Source: PubMed Central journal article supplement (PMC7784612)
Supplement: NIHMS1649974-supplement-1.pdf [file NIHMS1649974-supplement-1.pdf]

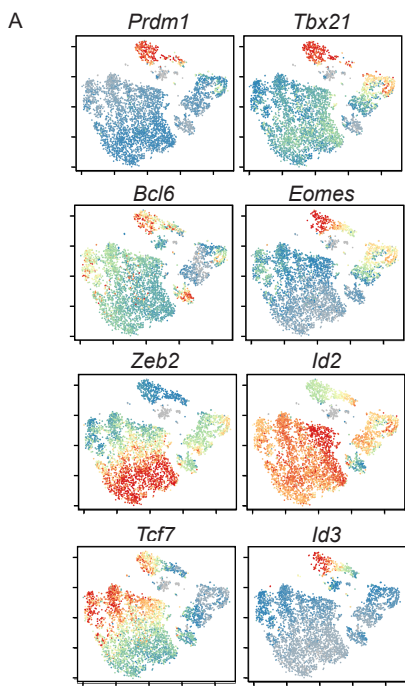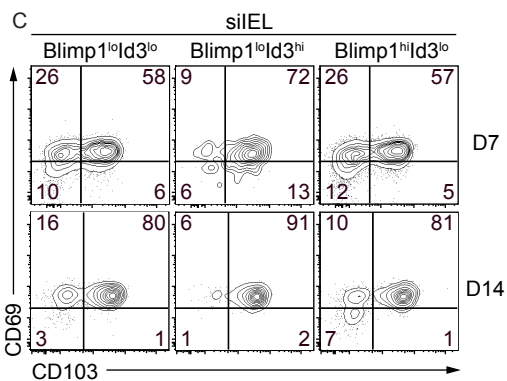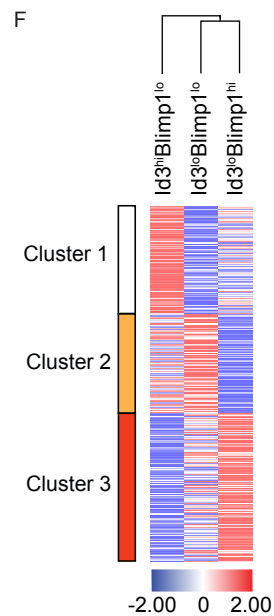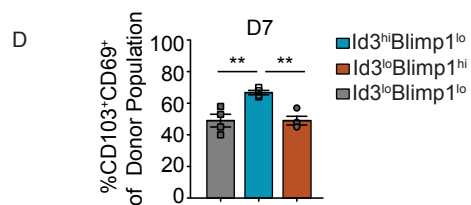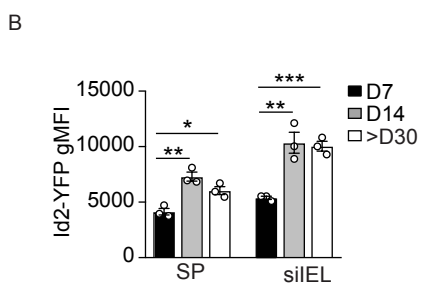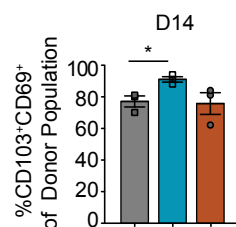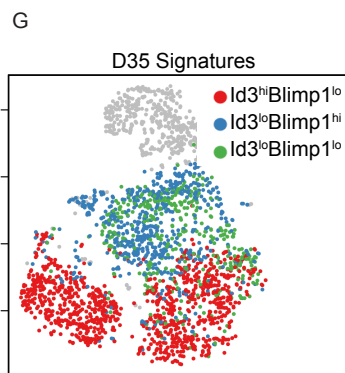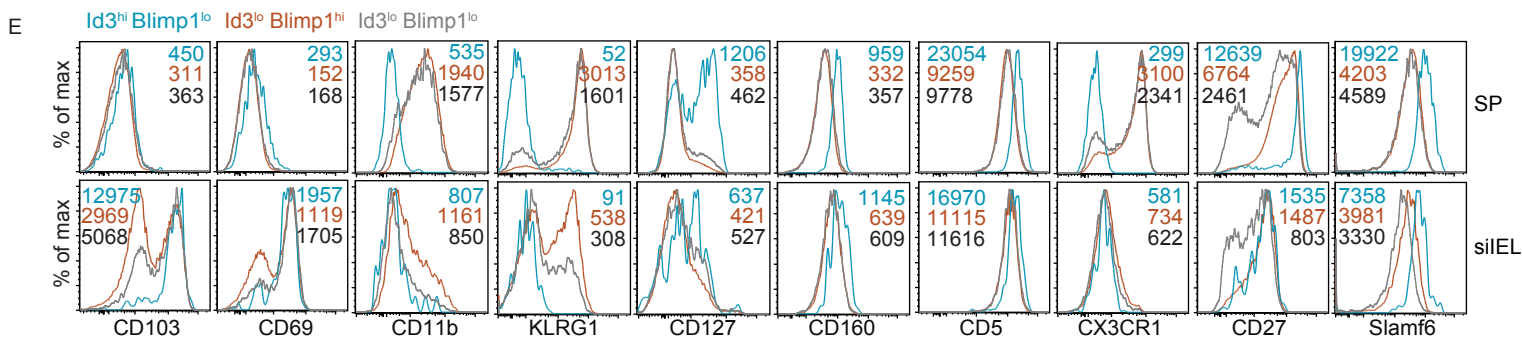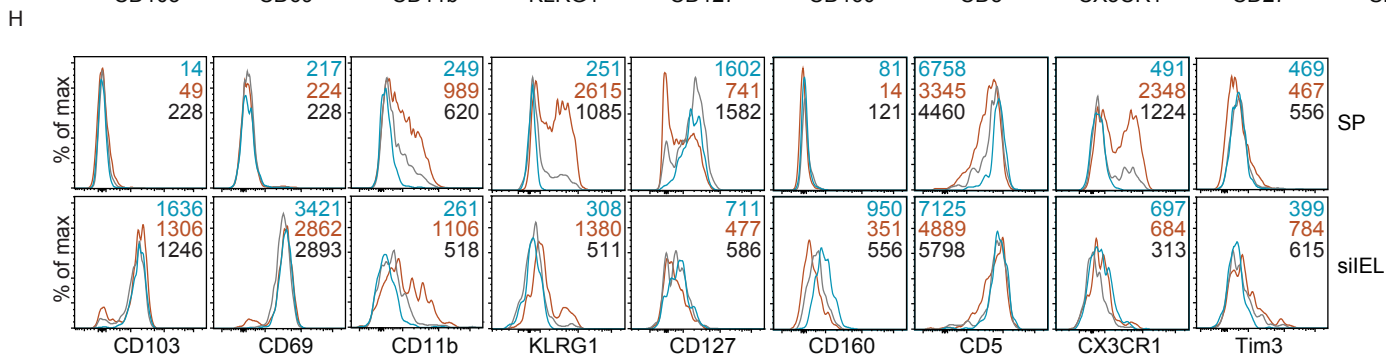

**Figure S1. Heterogeneity in anti-viral CD8<sup>+</sup> T cell populations (Related to Figures 2 and 3).** (A) P14 CD8<sup>+</sup> T cells were transferred into congenically distinct hosts that were subsequently infected with LCMV i.p. Donor cells from the spleen and siEL were sorted over the course of infection for scRNA-seq. tSNE plots of cells from the spleen over all infection timepoints shaded by intensity of relative expression of indicated transcriptional regulator. (B) Id2-YFP/Id3-GFP P14 CD8<sup>+</sup> T cells were transferred into congenically distinct hosts that were infected with LCMV i.p. At indicated times of infection, Id2-YFP reporter expression was analyzed in the P14 cells isolated from the spleen and siEL by flow cytometry and the gMFI is quantified. (C-F) Congenically distinct Blimp1-YFP/Id3-GFP P14 CD8<sup>+</sup> T cells were transferred to wild-type hosts that were subsequently infected with LCMV i.p. (C) CD103 and CD69 expression on indicated populations is shown. (D) Quantification of populations in C. (E) On day 7 of infection, Id3<sup>hi</sup>Blimp1<sup>lo</sup>, Id3<sup>lo</sup>Blimp1<sup>hi</sup>, and Id3<sup>lo</sup>Blimp1<sup>lo</sup> P14 CD8<sup>+</sup> T cells from spleen (SP) and siEL were analyzed by flow cytometry. (F) On day 35 of infection, Id3<sup>hi</sup>Blimp1<sup>lo</sup>, Id3<sup>lo</sup>Blimp1<sup>hi</sup>, and Id3<sup>lo</sup>Blimp1<sup>lo</sup> P14 CD8<sup>+</sup> T cells were sorted from siEL for RNA-sequencing. A heatmap illustrating the relative expression of genes differentially expressed among the 3 sorted populations is shown; gene clusters are ordered through K-means clustering analysis. (G) As in A, tSNE plots of cells from the siEL over all timepoints shaded by intensity of indicated transcriptional signatures at day 35 following LCMV infection. (H) As in E, Id3<sup>hi</sup>Blimp1<sup>lo</sup>, Id3<sup>lo</sup>Blimp1<sup>hi</sup>, and Id3<sup>lo</sup>Blimp1<sup>lo</sup> P14 CD8<sup>+</sup> T cells from spleen (SP) and siEL were analyzed by flow cytometry on day 25-27 of infection. Numbers in plots represent the frequency of cells in the indicated gate (C) or gMFI (E,H). All data are from one representative experiment of 2 independent experiments with n=3. Graphs show mean ± SEM; \*p<0.05, \*\*p<0.01, \*\*\*p<0.001.

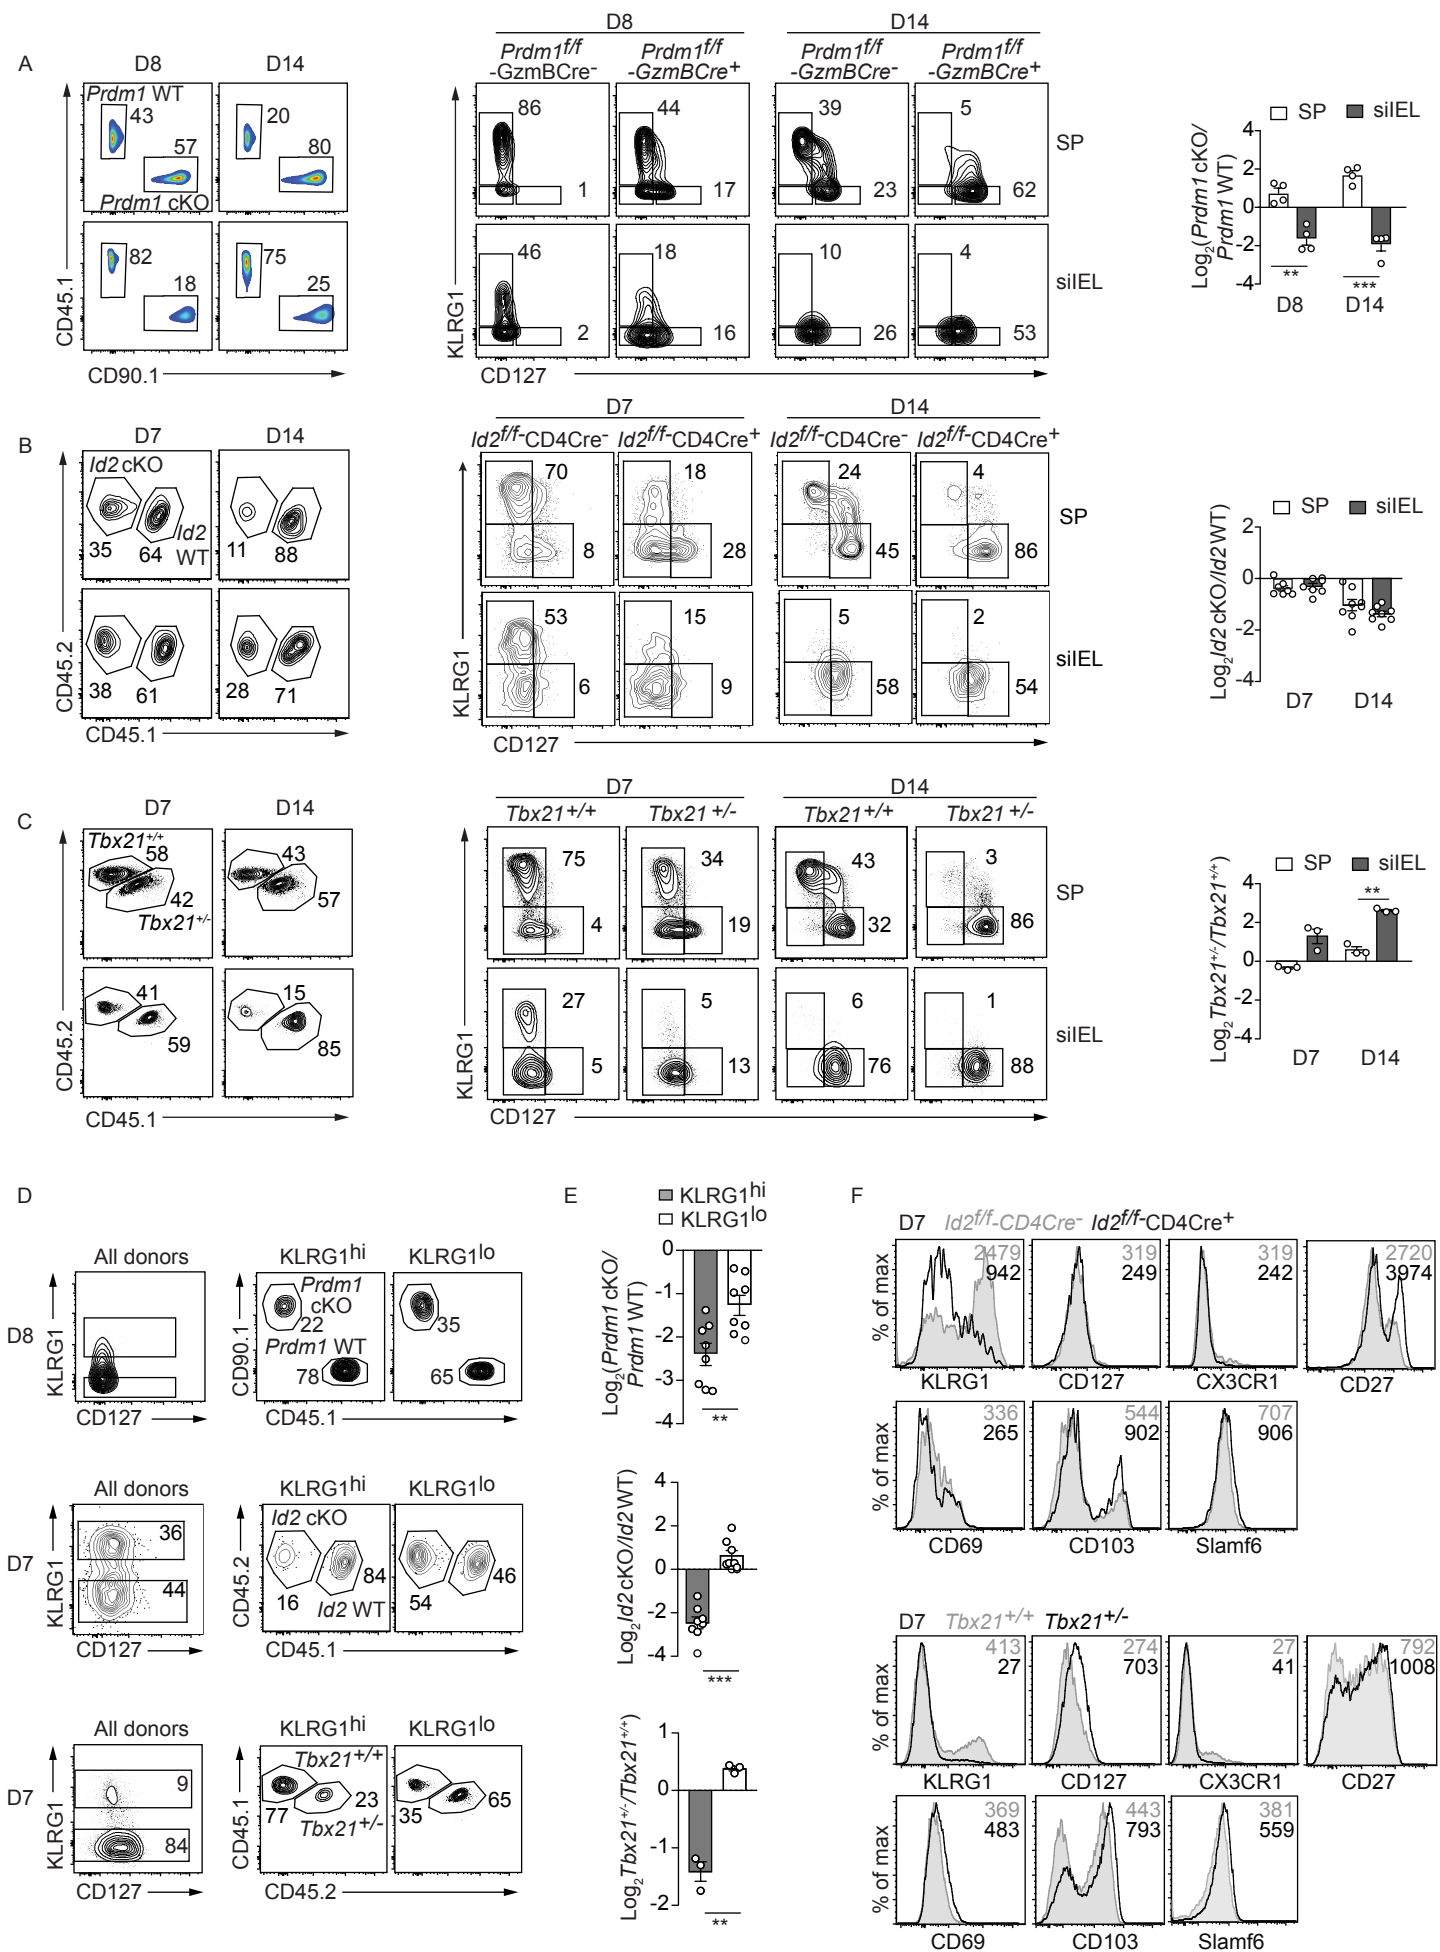

**Figure S2. Pro-effector transcriptional regulators control siEL CD8<sup>+</sup> T cell differentiation (Related to Figure 5).** Mixed transfer of congenically distinct Prdm1<sup>fl/fl</sup>-GzmBCre<sup>+</sup> (Prdm1 cKO) and Prdm1<sup>+/+</sup> (Prdm1 WT), Id2<sup>fl/fl</sup>-CD4Cre<sup>+</sup> (Id2 cKO) and Id2<sup>fl/fl</sup>-CD4Cre<sup>-</sup> (Id2 WT) or Tbx21<sup>+/-</sup> and Tbx21<sup>+/+</sup> P14 CD8<sup>+</sup> T cells into recipient mice that were subsequently infected with LCMV. Donor P14 cells from host spleen and siEL were analyzed by flow cytometry at indicated times of infection. **(A-C)** Frequency of indicated donor populations among CD8<sup>+</sup> T cells and corresponding quantification is shown (left). KLRG1 and CD127 expression on indicated donor populations is represented (middle/right). **(D)** KLRG1<sup>hi</sup> and KLRG1<sup>lo</sup> populations of all donor P14 CD8<sup>+</sup> T cells from the siEL (left) and the frequency of the donor cells within these populations (right) is shown. **(E)** Quantification of populations from D. **(F)** Expression of indicated molecules is compared between Id2<sup>fl/fl</sup>-CD4Cre<sup>+</sup> and Id2<sup>fl/fl</sup>-CD4Cre<sup>-</sup> (top) or Tbx21<sup>+/-</sup> and Tbx21<sup>+/+</sup> (bottom). Numbers in plots represent the frequency (A-D) or gMFI (F) of cells in the indicated gate. All data are from one representative experiment of 2 independent experiments with n=3-5. Graphs show mean ± SEM; \*\*p<0.01, \*\*\*p<0.001.

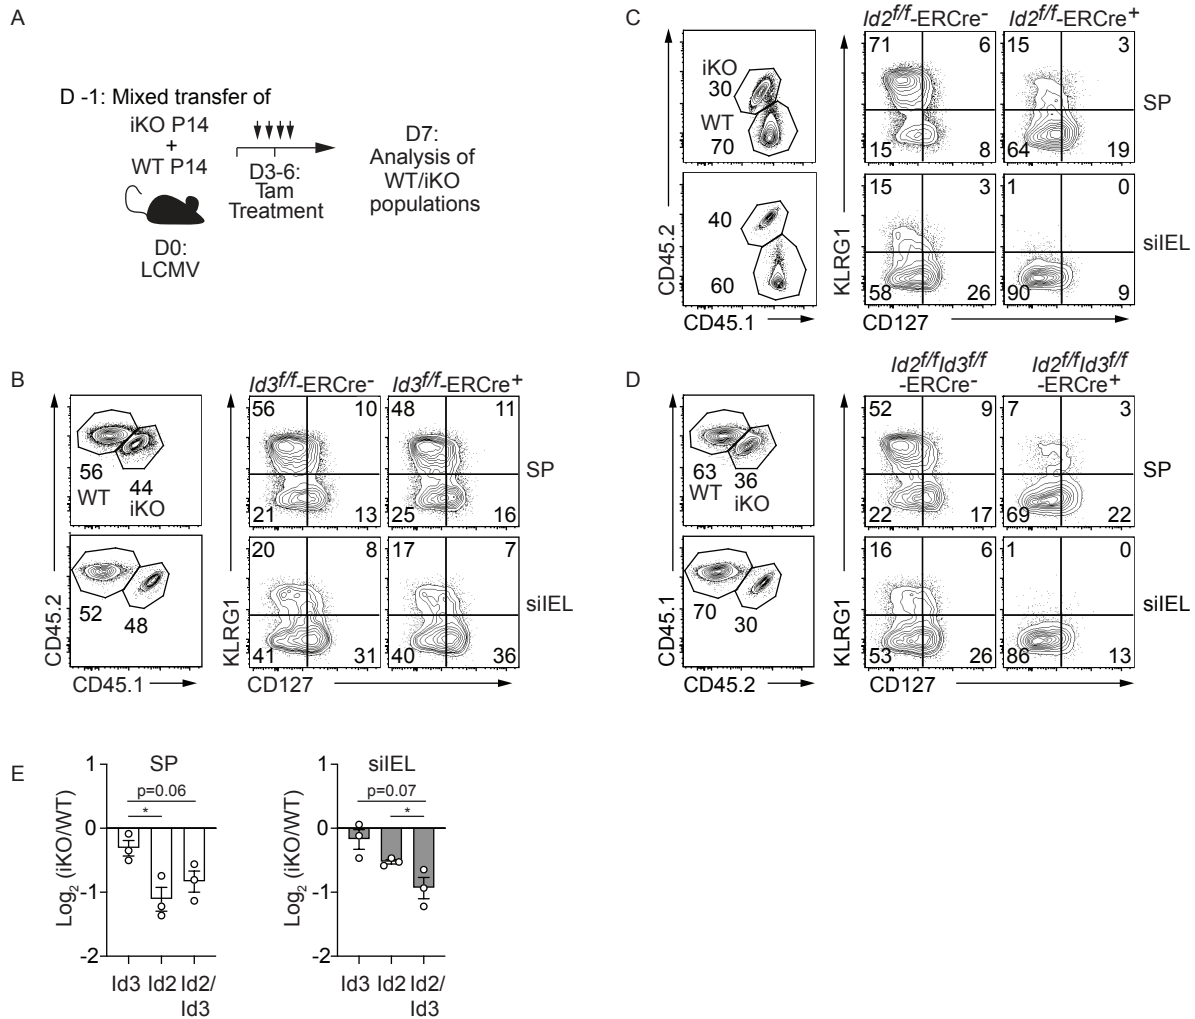

**Figure S3. Id2 and Id3 mediate the formation of siIEL CD8<sup>+</sup> T cell populations (Related to Figure 5).** (A) Schematic of experimental set-up. A mix of congenically distinct *Id2<sup>fl/fl</sup>-ERCre<sup>+</sup>*, *Id3<sup>fl/fl</sup>-ERCre<sup>+</sup>*, or *Id2<sup>fl/fl</sup>Id3<sup>fl/fl</sup>-ERCre<sup>+</sup>* (iKO) and corresponding wild type *ERCre<sup>-</sup>* (WT) P14 CD8<sup>+</sup> T cells were transferred to recipients that were subsequently infected with LCMV i.p. On day 3 of infection, host mice were treated for 4 consecutive days with tamoxifen (Tam) to induce (B) Id3, (C) Id2 or (D) Id2 and Id3 deletion. Transferred P14 CD8<sup>+</sup> T cells from host spleen (SP) and siIEL were analyzed by flow cytometry on day 7 of infection. Frequency of WT and iKO cells among P14 CD8<sup>+</sup> T cells (left) and corresponding KLRG1 and CD127 expression (right) is represented. (E) Quantification of the frequency of indicated populations is displayed. Data are expressed as mean  $\pm$  SEM. Numbers in plots represent frequency of cells in the indicated gate. All data are from one experiment with  $n=3$ . Graphs show mean  $\pm$  SEM; \* $p<0.05$ , \*\* $p<0.01$ .

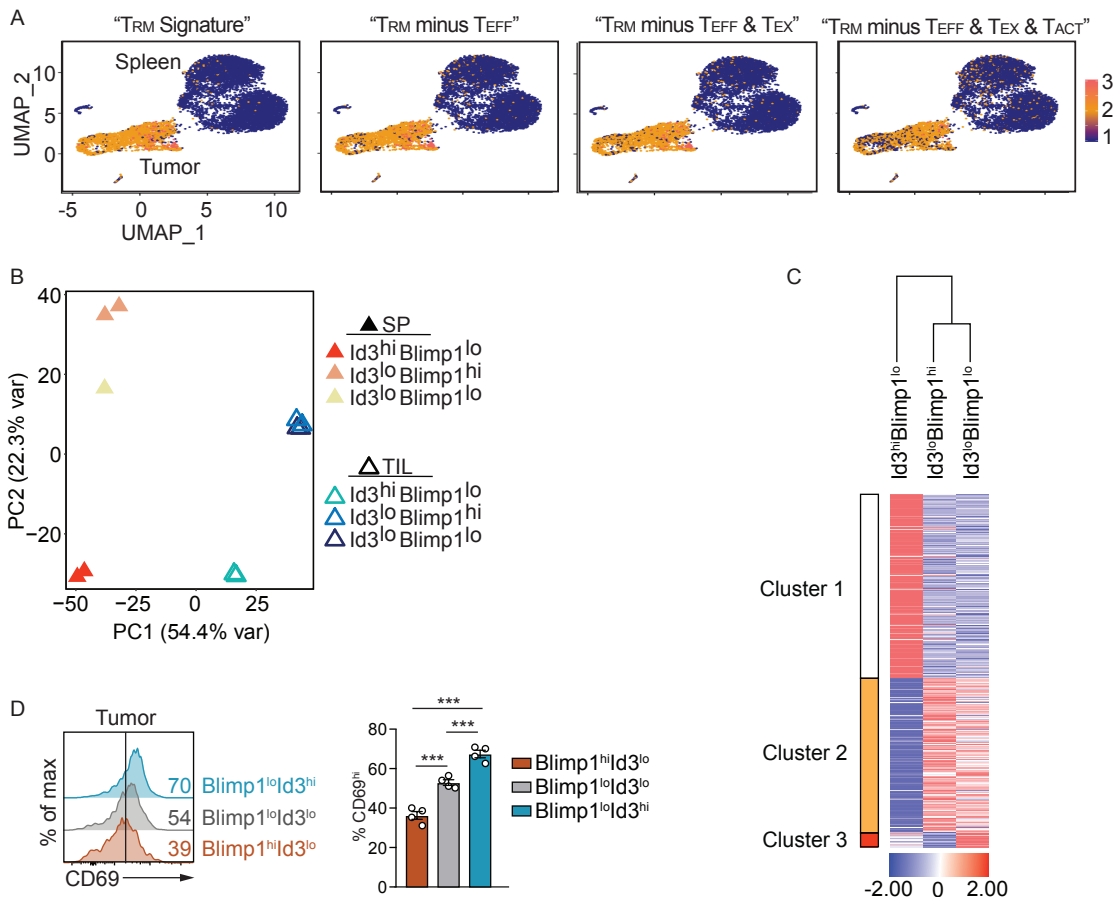

**Figure S4. Heterogeneity in Trm cell-like TIL populations (Related to Figure 6).** Congenically distinct WT or Id3-GFP/Blimp1-YFP P14 cells were transferred into B16-GP<sub>33-41</sub> tumor-bearing mice, and one-week post adoptive transfer, WT P14 CD8<sup>+</sup> T cells were sorted from spleen and tumors for scRNA-Seq analysis and Id3<sup>hi</sup>Blimp1<sup>lo</sup>, Id3<sup>lo</sup>Blimp1<sup>hi</sup>, and Id3<sup>lo</sup>Blimp1<sup>lo</sup> P14 CD8<sup>+</sup> T cells were sorted for bulk RNA-Seq analysis, or analyzed by flow cytometry. **(A)** UMAP plot of WT P14 cells sorted from tumor and spleen indicating relative enrichment of the core tissue-residency signature (left) and the same list with the removal of characteristic effector T cell (middle left), exhausted T cell (middle right) and activated T cell (right) associated genes. **(B)** Principal component analysis of gene expression from the sorted P14 CD8<sup>+</sup> T cells from tumors is shown. **(C)** Heatmap illustrating the relative expression of genes differentially expressed among the 3 sorted populations is shown; populations are ordered through hierarchical clustering analysis and gene clusters are ordered through K-means clustering analysis. **(D)** Donor cells from tumors were analyzed for CD69 expression. Numbers in plots represent frequency of cells in the indicated gate. All data are from one representative experiment with n=4. Graphs show mean ± SEM; \*\*\*p<0.005.

**Supplemental Table 1. Effector Gene Signature (related to Figure 1)**

|               |               |               |              |           |         |
|---------------|---------------|---------------|--------------|-----------|---------|
| 1700017B05Rik | Cd86          | Ezh2          | Itgb1        | Prr13     | Top2a   |
| 2010002N04Rik | Cdc20b        | F630043A04Rik | Jup          | Prr5l     | Tpx2    |
| 2010012O05Rik | Cdc25b        | Fam129a       | Kif11        | Prune     | Trdn    |
| 2610029I01Rik | Cdk1          | Fancm         | Kif15        | Ptms      | Trio    |
| 2810417H13Rik | Cdk2          | Fhl2          | Kif22        | Pus10     | Tspan2  |
| 2810417H13Rik | Cenpa         | Fkbp5         | Kif23        | Pycard    | Tspan32 |
| 3110052M02Rik | Cenpe         | Gabarapl1     | Klra10       | Rab11fip4 | Ubash3b |
| 4930447A16Rik | Cenpk         | Galnt3        | Klra3        | Racgap1   | Unc119  |
| 4930515G01Rik | Cep55         | Gem           | Klra6        | Rap1gap2  | Usp3    |
| 4930547N16Rik | Cep76         | Glcc1         | Klra8        | Rbms1     | Usp46   |
| 6330403K07Rik | Cercam        | Gm10286       | Klre1        | Reep5     | Whsc1   |
| A630007B06Rik | Chd7          | Gm10785       | Klrg1        | Rhoq      | Xlr     |
| Adam17        | Chn2          | Gm10786       | Kntc1        | Rnf19a    | Xpnpep1 |
| Ahnak         | Chsy1         | Gm11277       | Lag3         | Rnf216    | Zeb2    |
| AI597468      | Cited2        | Gm14005       | Lamc1        | Rnpep     | Zfand5  |
| Ak3           | Cldnd2        | Gm4884        | Lass6        | Rora      | Zfp40   |
| Alcam         | Cmklr1        | Gm8615        | Lgals1       | Rrm2      | Zfp874b |
| Anln          | Cmpk1         | Gna15         | Lgals3       | S100a4    |         |
| Anxa4         | Cry1          | Gpx8          | Lmnb1        | S1pr5     |         |
| Apaf1         | Crybg3        | Grxcr1        | LOC100503984 | Scd2      |         |
| Apobec2       | Csda          | Gsn           | Lxn          | Serinc5   |         |
| Arhgap11a     | Csnk1e        | Gzma          | Manba        | Serpinb6b |         |
| Arhgap19      | Ctnnbip1      | Gzmb          | Mki67        | Shcbp1    |         |
| Arhgef12      | Ctsc          | Gzmk          | Msc          | Slc25a20  |         |
| Arntl         | Cx3cr1        | Havcr2        | Mxi1         | Slc25a33  |         |
| Art2a-ps      | Cyp3a16       | Hbb-b2        | Ncapg        | Slc25a45  |         |
| As3mt         | D330041H03Rik | Hiatl1        | Ndn12        | Slc4a7    |         |
| Asna1         | Dapk2         | Hist1h1b      | Nebi         | Snx10     |         |
| Atoh1         | Dclk2         | Hist1h2ab     | Nipal3       | Snx5      |         |
| Atp2a3        | Ddx19b        | Hist1h2ak     | Nqo2         | Sord      |         |
| Atp6v1d       | Ddx28         | Hist1h2bf     | Nrp1         | Sp140     |         |
| AU022870      | Dennd5a       | Hist1h2bj     | Olfr598      | Spag1     |         |
| BC013712      | Depdc1a       | Hist1h2bk     | Olfr766      | Spag5     |         |
| Bhlhe40       | Depdc1b       | Hist1h2bm     | Osbpl3       | Spast     |         |
| Bub1          | Dhx40         | Hist1h2bn     | Osbpl8       | Spc25     |         |
| Bub1b         | Dlgap5        | Hmgb2         | Palm         | Spn       |         |
| C330027C09Rik | Dnajc1        | I830127L07Rik | Pdcd1        | Sptlc2    |         |
| Car5b         | Dock5         | Icos          | Pgm2l1       | Stmn1     |         |
| Carhsp1       | Dtl           | Idh2          | Pld4         | Stx11     |         |
| Casc5         | Dync1li2      | Igf2bp3       | Plek         | Sun1      |         |
| Casp3         | E2f2          | Il18rap       | Plekhf1      | Suox      |         |
| Casp7         | E2f8          | Inpp4a        | Plekho1      | Swap70    |         |
| Ccna2         | Efh2          | Irf4          | Pmaip1       | Tbcc      |         |
| Ccnb1         | Emp1          | Itga2         | Pola1        | Tbkbp1    |         |
| Ccnb2         | Ern1          | Itga4         | Prc1         | Timp2     |         |
| Ccne2         | Esm1          | Itgam         | Prdm1        | Tmem165   |         |
| Cd68          | Etfb          | Itgax         | Prdx4        | Tmf1      |         |



**Supplemental Table 2. Memory Gene Signature (related to Figure 1)**

|               |               |               |         |           |         |          |            |
|---------------|---------------|---------------|---------|-----------|---------|----------|------------|
| Gene_Symbol   |               |               |         |           |         |          |            |
| 0610037L13Rik | B3galt6       | D17H6S56E-5   | Fam116b | Gtpbp4    | Mat2a   | Nsg2     | Rabggtb    |
| 1600012F09Rik | Bach2         | D630037F22Rik | Fam122b | H2-Ob     | Mboat1  | Nt5e     | Rapgef6    |
| 1700021A07Rik | Bat1a         | Dapl1         | Fam125b | Haus5     | Mcoln2  | Oasl2    | Rcl1       |
| 1700021C14Rik | Bbs2          | Dars          | Fam134b | Heatr1    | Mdn1    | Olfir316 | Rgs10      |
| 2410002F23Rik | BC005685      | Dctd          | Fam169b | Heatr5a   | Mettl1  | P2ry10   | Rnaseh2a   |
| 2410066E13Rik | BC016423      | Ddx18         | Fam46a  | Hectd2    | Mgrn1   | Pa2g4    | Rnf122     |
| 2610019F03Rik | BC048403      | Ddx51         | Fam46c  | Herpud1   | Mid1    | Paics    | Rnf130     |
| 2610030H06Rik | BC049349      | Ddx56         | Farsb   | Hexa      | Mif     | Pam      | Rnf141     |
| 4732471D19Rik | BC057079      | Ddx60         | Fastkd2 | Hipk2     | Mipep   | Parp12   | Rnf144a    |
| 4930420K17Rik | Bckdhb        | Dennd2d       | Fcgr2b  | Hook1     | Mir29c  | Parp8    | Rny1       |
| 4930522L14Rik | Bcl2          | Dennd4a       | Fchsd2  | Hs3st3b1  | Mir342  | Pde2a    | Rny3       |
| 4933439F18Rik | Bcl7a         | Dguok         | Fntb    | Hsd17b11  | Mki67ip | Pdk2     | Rpl10      |
| 5830405N20Rik | Bmpr1a        | Dhdds         | Foxp1   | Hsd17b12  | Mmab    | Pdlim1   | Rpl10a     |
| 6330409N04Rik | Bnip3         | Dirc2         | Fpgs    | Hsp90aa1  | Mmachc  | Pebp1    | Rpl11      |
| 6530401N04Rik | Brix1         | Dkc1          | Fpgt    | Hsp90ab1  | Mov10   | Pex3     | Rpl12      |
| A2ld1         | Btbd11        | Dkk1          | Gaa     | Hspe1     | Mrpl23  | Pgm3     | Rpl13      |
| A630038E17Rik | Btbd19        | Dmrta1        | Gapdhs  | Hus1      | Mrpl35  | Pilrb2   | Rpl15      |
| AB041803      | Btla          | Dnajb2        | Gart    | Hvcn1     | Mrpl38  | Pisd-ps1 | Rpl21      |
| AB124611      | C1qbp         | Dock6         | Gas5    | Ier3      | Mrpl52  | Pkp4     | Rpl21-ps10 |
| Abca1         | C230055K05Rik | Dock9         | Gas7    | Ifi30     | Mrps18b | Plekha1  | Rpl23      |
| Abcc1         | Cad           | Dph5          | Gbe1    | Ifrd2     | Ms4a4a  | Plrg1    | Rpl23a     |
| Abce1         | Cbx7          | Dse           | Gm10345 | Ift172    | Ms4a4c  | Pltp     | Rpl27      |
| Abhd11        | Ccdc101       | Dtx1          | Gm11968 | Ikbkb     | Mtg1    | Polr1a   | Rpl27a     |
| Abhd14b       | Ccnd2         | Dtx4          | Gm12191 | Il10rb    | Mthfd1  | Polr1b   | Rpl29      |
| Abhd6         | Ccr7          | Dus4l         | Gm13139 | Il2ra     | Mtx3    | Polr2e   | Rpl3       |
| Acs11         | Cd2ap         | Dynlt3        | Gm14326 | Il2rb     | Mybbp1a | Polr3e   | Rpl30      |
| Acvr1b        | Cd44          | Dzip1         | Gm14391 | Il4ra     | Myc     | Pomt1    | Rpl31      |
| Acvr2a        | Cd55          | E430029J22Rik | Gm14403 | Il6ra     | Myo3b   | Pou6f1   | Rpl32      |
| Al480653      | Cd69          | Echdc1        | Gm14420 | Il6st     | Naa10   | Ppie     | Rpl35      |
| Aldh6a1       | Cd7           | Edaradd       | Gm16489 | Il7r      | Naa25   | Ppih     | Rpl36      |
| Aldoa         | Cd72          | Eef1e1        | Gm4979  | Impdh2    | Naip5   | Ppp1r14b | Rpl36a     |
| Alg1          | Cd93          | Eef2k         | Gm4983  | Inadl     | Nat10   | Pprc1    | Rpl38      |
| Alg8          | Cdh1          | Efha2         | Gm5244  | Inpp4b    | ND3     | Prdx6    | Rpl39      |
| Ampd3         | Cdk4          | Ehd3          | Gm5921  | Insr      | Ndufa4  | Prmt7    | Rpl41      |
| Apex1         | Celsr1        | Eif4a2        | Gm9104  | Ipo4      | Ndufa5  | Pros1    | Rpl8       |
| Apol7b        | Cenpt         | Elovl5        | Gm9457  | Jmjd8     | Ndufaf4 | Prrg1    | Rpl9       |
| Apol7e        | Chic1         | Emb           | Gng5    | Kbtbd11   | Nek1    | Prrg4    | Rplp1      |
| Aqp9          | Cisd1         | Enpp4         | Gnl3    | Kcnj8     | Neurl3  | Prss12   | Rpp38      |
| Arhgap39      | Cnbp          | Enpp5         | Gpatch4 | Lipo1     | Nle1    | Psme1    | Rpp40      |
| Arhgap5       | Cnr2          | Entpd5        | Gpr114  | Lmbr1     | Nme1    | Psmg1    | Rps10      |
| Arrb1         | Cnrip1        | Entpd6        | Gpr155  | LOC641050 | Nme2    | Ptges3   | Rps12      |
| Ass1          | Coro2a        | Eral1         | Gpr183  | Lpar5     | Nol6    | Ptma     | Rps14      |
| Atg14         | Crim1         | Ergic1        | Gpr97   | Ltb       | Nop10   | Pus7     | Rps15      |
| Atn1          | Crtam         | Erich1        | Gpx1    | Ly6a      | Nop16   | Pwp2     | Rps15a     |
| Atp6v0d2      | Cst7          | Evl           | Gramd4  | Ly6e      | Nop56   | Qser1    | Rps16      |
| Atp8a2        | Ctdsp2        | Exosc1        | Grwd1   | Lyplal1   | Nop58   | Qtrtd1   | Rps2       |
| Atpbd4        | Ctss          | Faah          | Gstk1   | Map4k3    | Nr1d1   | Rab37    | Rps23      |
| B230307C23Rik | Cxcr4         | Fam101b       | Gsto1   | Mapk11    | Nr1d2   | Rab6b    | Rps24      |
| B230315N10Rik | D130062J21Rik | Fam102a       | Gstp1   | Mars2     | Nr2c1   | Rabac1   | Rps26      |



|           |          |          |         |
|-----------|----------|----------|---------|
| Rps27     | Snord47  | Trmt61a  | Zscan12 |
| Rps28     | Snord49b | Trove2   |         |
| Rps3      | Snord53  | Trp53    |         |
| Rps5      | Snord57  | Tsga10ip |         |
| Rps8      | Snord8   | Tspan13  |         |
| Rps9      | Snord95  | Tspan31  |         |
| Rpsa      | Snrpg    | Tsr1     |         |
| Rrp15     | Snx16    | Tsr2     |         |
| Rrp1b     | Socs3    | Ttc27    |         |
| Rtp4      | Spef2    | Ttc28    |         |
| Rundc3b   | Spint2   | Tuba1b   |         |
| Samd3     | Srm      | Tuba1c   |         |
| Satb1     | Ssbp2    | Tuba4a   |         |
| Scamp4    | Ssh2     | Tubb5    |         |
| Scarna13  | Sucg2    | Uba52    |         |
| Sell      | Surf2    | Ube2cbp  |         |
| Serpina3f | Taf1d    | Unc5a    |         |
| Sesn3     | Taf4b    | Urb1     |         |
| Sfxn1     | Tasp1    | Ust      |         |
| Sh3bp5    | Tcf7     | Utp15    |         |
| Sigmar1   | Tcfap4   | Utp20    |         |
| Sil1      | Tdrd7    | Uxt      |         |
| Sit1      | Tfrc     | Vars     |         |
| Slc11a2   | Tgtp1    | Vipr1    |         |
| Slc12a7   | Thada    | Vkorc1   |         |
| Slc14a1   | Thoc1    | Vmn2r29  |         |
| Slc19a1   | Thra     | Vmn2r86  |         |
| Slc26a11  | Timm10   | Vwa5a    |         |
| Slc7a1    | Timm8a1  | Wbscr27  |         |
| Slc7a5    | Tmem38b  | Wdr12    |         |
| Sln1      | Tmem48   | Wdr18    |         |
| Sln5      | Tmem63a  | Wdr36    |         |
| Smyd2     | Tmx2     | Wdr46    |         |
| Smyd3     | Tnf      | Wdr49    |         |
| Smyd5     | Tnfrsf18 | Wwp1     |         |
| Snhg1     | Tnfrsf22 | Xcl1     |         |
| Snora21   | Tnfrsf26 | Xrcc5    |         |
| Snora23   | Tnfsf10  | Yars2    |         |
| Snora3    | Tnfsf8   | Yes1     |         |
| Snora44   | Tpi1     | Zbtb20   |         |
| Snora52   | Tpt1     | Zcwpw1   |         |
| Snora61   | Traf1    | Zdhhc23  |         |
| Snora62   | Trem12   | Zeb1     |         |
| Snora69   | Trim12a  | Zfp110   |         |
| Snora7a   | Trim30d  | Zfp238   |         |
| Snord104  | Trio     | Zfp280d  |         |
| Snord1c   | Trmt1    | Zfp781   |         |
| Snord32a  | Trmt112  | Zhx2     |         |
| Snord35a  | Trmt5    | Zmat1    |         |
